1 **The brown alga *Saccharina japonica* features distinct**  
2 **vanadium-dependent bromoperoxidases and iodoperoxidases**

3

4 **Shan Chi<sup>1,2</sup>, Tao Liu<sup>1\*</sup>, Hongxin Yin<sup>1</sup>, Xin Xu<sup>1</sup>, Weiming Zhu<sup>1</sup>, Yi Wang<sup>1</sup>, Cong Wang<sup>1</sup>, Hui**  
5 **Lv<sup>1</sup>**

6 <sup>1</sup> Ocean University of China, Qingdao, P. R. China,

7 <sup>2</sup> Qingdao Haida BlueTek Biotechnology Co., Ltd, Qingdao, P. R. China.

8

9 **\*Corresponding author: [liutao@ouc.edu.cn](mailto:liutao@ouc.edu.cn) (Tao Liu)**

10

11

12

13

14

15

16

17

18

19

20

21

22

23

24

25

26

27

28

29

30 **Abstract**

31 Marine algae have an extraordinary ability to absorb halogens which provide algae with an  
32 inorganic antioxidant impacting atmospheric chemistry. Although brown algal Laminariales  
33 species are the most efficient iodine accumulators among all living systems, and *Saccharina*  
34 *japonica* is the primary material used for iodine extraction, the functions and regulatory  
35 mechanisms of these species have not been fully documented. In this study, a functional genomics  
36 analysis of the algal vanadium-dependent haloperoxidase (*vHPO*) gene family was conducted;  
37 these genes can introduce halogen atoms into organic compounds. The comprehensive analyses  
38 regarding the bioinformatics and phylogenetics of novel genomic and transcriptomic sequencing  
39 data of 21 Rhodophyta and 19 Ochrophyta marine algal species revealed that brown algal *vHPOs*  
40 have two gene types, vanadium-dependent bromoperoxidase (*vBPO*) and vanadium-dependent  
41 iodoperoxidase (*vIPO*), with secondary endosymbiotic host origin. The enzyme activity of *S.*  
42 *japonica* *vBPO* and *vIPO* were verified for the first time and were quite stable in a wide range of  
43 temperature and pH values. However, the specific activity and optimal conditions were  
44 considerably different between *vBPO* and *vIPO*. The transcript expression analysis in different *S.*  
45 *japonica* tissues (including rhizoids), generations (sporophytes and gametophytes), sexes (male  
46 and female), and stress conditions (hyposaline and hyperthermia) also showed great differences  
47 between *vBPOs* and *vIPOs*. Most of the *vBPOs* were constitutively expressed with higher  
48 expression dose, which may be responsible for basal halogen metabolism. On the contrary, *vIPOs*  
49 mainly showed specific expression, which may be involved in tissue differentiation, generation  
50 differentiation, sex differentiation, and stress regulation. Comprehensive analysis of gene family  
51 evolution, enzyme biochemical characteristics, and complex transcriptional mechanisms were  
52 conducive to the environmental adaptation and sophisticated system evolution of Laminariales.  
53 The successful bromination of small-molecule compound substrate by *SjavBPO* provided high  
54 activity and efficient enzymatic tools for artificial synthesis of halogenated compounds.

55

56 **Key words:** *Saccharina japonica*, vanadium-dependent haloperoxidases, Laminariales, halogen,  
57 enzyme activity, RNA sequencing

58

59

## 60 **Introduction**

61 A halogen substituent is often an essential structural feature of natural products, drugs, or  
62 signaling molecules. At present, over 5,000 halogenated compounds have been isolated, including  
63 halogenated hydrocarbons, halogenated acetylenes, halogenated phenols, halogenated tyrosine,  
64 halogenated fatty acids, and halogenated terpenes (Frank, *et al.*, 2016). They are mainly derived  
65 through marine algal biosynthesis, which has important biological functions (*e.g.*, signaling  
66 molecules and defense compounds) and ecological and atmospheric significance (La Barre, *et al.*,  
67 2010). Brown algae are widely distributed in temperate and subtropical zones and are an important  
68 component of subtidal and intertidal ecosystems (Charrier, *et al.*, 2012). The order Laminariales is  
69 the most efficient iodine accumulator among all living systems, with an average content of 1.0%  
70 dry weight in most *Laminaria* and *Saccharina* species, representing approximately a 30,000-fold  
71 accumulation of this element from seawater (Saenko, *et al.*, 1978; Leblanc, *et al.*, 2006). This is  
72 the reason *Laminaria* was previously used in Europe as raw material for iodine extraction (Lüning,  
73 1985) and *Saccharina* in China as a dietary iodine supplement to prevent goiter (Brinkhuis, *et al.*,  
74 1987).

75 Nature has evolved exquisite methods to introduce halogen atoms into organic compounds  
76 using halogenating enzymes. The vanadium-dependent haloperoxidase (vHPO) is one of the most  
77 studied types among these enzymes due to its biocatalytic properties, including an unusual  
78 stability and tolerance for heat and organic solvents (Coupe, *et al.*, 2007; Fernández-Fueyo, *et al.*,  
79 2015; Sabuzi, *et al.*, 2015; Weichold, *et al.*, 2016). It can be divided into vanadium-dependent  
80 chloroperoxidase (vCPO), vanadium-dependent bromoperoxidase (vBPO), and  
81 vanadium-dependent iodoperoxidase (vIPO), depending on the oxidation ability of the halogen  
82 ions. The first vHPO to be isolated and characterized was the vBPO from the brown alga  
83 *Ascophyllum nodosum* (Vitler, 1984). To date, vHPOs have been characterized from all major  
84 classes of marine algae, such as brown algae (Vreeland, *et al.*, 1998; Weyand, *et al.*, 1999), red  
85 algae (Itoh, *et al.*, 1986, 1987; Shimonishi, *et al.*, 1998; Isupov, *et al.*, 2000), green algae (Itoh,  
86 1985; Wever, *et al.*, 1985; de Boer, *et al.*, 1986; Sheffield, 1993; Ohshiro, 1999; Manley, 2001;  
87 Colin, 2003; Suthiphongchai, 2008), as well as terrestrial lichens (Plat, *et al.*, 1987), fungi (van  
88 Schijndel, *et al.*, 1993; Barnett, *et al.*, 1998), and cyanobacteria (Frank, *et al.*, 2016). These three  
89 enzymes, in terms of the gene structure, have the same conservative metal ion binding sites; the

90 histidine residues of imidazole rings, the region for vanadium ions, and amino acid series have a  
91 high degree of homology (Littlechild, *et al.*, 2002). Overall, *vCPO* gene is mainly found in  
92 terrestrial organisms, whereas *vBPO* is mainly found in marine organisms, and *vIPO* is only found  
93 in a small number of marine brown algae (Gribble, 2004).

94 There are few studies on the metabolism of halogens in marine algae. It has been shown that in  
95 some brown algae (Wever, *et al.*, 1991) and a green macroalga (Manley, 2001), the vBPOs were  
96 located at or near the surface of the seaweed. The possible role of the extracellular enzymatic  
97 system may be to control the colonization of the surfaces of the seaweed by generating HOBr,  
98 which is directly bactericidal (Hansen, *et al.*, 2003; Renirie, *et al.*, 2008). Until recently, the  
99 mechanism of their accumulation, metabolism, and transportation needed further study. In the  
100 present study, the first functional *vBPO* and *vIPO* from *S. japonica* were identified. In addition to  
101 phylogenetic analysis and transcriptional regulation, this may be worthy of an in-depth study  
102 regarding physiological adaptations and relationships with ecological systems and the atmospheric  
103 environment. Such research might also provide a platform for diverse protein engineering efforts,  
104 and thus an opportunity to establish a new chemoenzymatic halogenation tool in the future.

105

## 106 **Materials and methods**

### 107 *Algal sample collection*

108 Preserved *S. japonica* haploid gametophytes (male and female) were available as laboratory  
109 cultures and were obtained from our Laboratory of Genetics and Breeding of Marine Organisms.  
110 Fresh samples of the *Saccharina* sporophytes (rhizoids, stipe, blade tip, blade pleat, blade base,  
111 and blade fascia) were collected from east China (Rongcheng, Shandong Province, 37°8'53"N,  
112 122°34'33"E). These samples were used for RNA Sequencing analysis. Various gametophyte  
113 samples (male and female) and tissues of sporophytes (rhizoids, stipe, blade tip, blade pleat, blade  
114 base, and blade fascia) were collected to analysis relative gene expressions. To detect the  
115 influences of abiotic factors, the female gametophytes and blade base of sporophytes were  
116 cultured under different temperatures (Control: 8°C; Hyperthermia: 18°C), salinities (Control:  
117 30‰; Hyposaline: 12‰), and circadian rhythms (Control: 30  $\mu\text{mol photons/m}^2\cdot\text{s}$  for 12 h;  
118 Darkness: no irradiance for 12 h).

119

120 ***Sequence analysis***

121 In the present study, genes were identified by analyzing transcriptomic and genomic sequencing  
122 data of *S. japonica* (Tao Liu, unpublished data), as well as of the species whose genomes and  
123 transcriptomes were sequenced and published in OneKP ([www.onekp.com](http://www.onekp.com)) or NCBI. Matching  
124 sequences were manually checked for accuracy with the corresponding known cDNA sequences.  
125 The unigenes related to *vHPO* were re-verified using the BLASTX algorithm  
126 (<http://blast.ncbi.nlm.nih.gov/Blast.cgi>). Sequence identities were calculated using the Clustal  
127 Omega tool (<http://www.ebi.ac.uk/Tools/msa/clustalo/>).

128

129 ***Phylogenetic tree construction***

130 All downloaded sequences are listed in Supplementary Fig. S1. The sequences were aligned using  
131 ClustalX 1.83 software (Thompson, *et al.*, 1997). The amino acid phylogenetic trees were  
132 constructed using MrBayes 3.1.2 software (Ronquist and Huelsenbeck, 2003). The posteriori  
133 probability was based on the Metropolis-Hastings-Green algorithm through four chains (Markov  
134 Chain Monte Carlo, MCMC) with the temperature set to 0.2°C. The chains were run for  
135 10,000,000 cycles (Posada and Crandall, 1998; Ronquist and Huelsenbeck, 2003). Random trees  
136 were constructed in the MCMC analysis, and one tree in every 1,000 generations was saved. After  
137 discarding the aging 25% of all tree samples, the residual samples were used to construct a  
138 consensus tree; the tree was rendered using Tree View v.1.6.5 software (Page, 1996).

139

140 ***Purification of recombinant proteins expressed in Escherichia coli***

141 One *vBPO* (*SjavBPO*) and one *vIPO* (*SjavIPO*) from *S. japonica* were synthesized (Shanghai  
142 Xuguan Biotechnological Development Co. LTD) to construct recombinant plasmids (NCBI  
143 accession number MG195954 and MG195955). *SjavBPO* and *SjavIPO* were cloned in pET32a.  
144 These recombinant plasmids were transformed into *E. coli* BL21 (DE3) cells. Isopropyl  
145  $\beta$ -D-1-thiogalactopyranoside (IPTG) was added at a concentration of 0.5 mM to induce the  
146 over-expression of the target proteins, and the bacterial cultures were incubated for 16 h at 20°C.  
147 His•Bind Resin and GST•Bind Resin were used according to the manufacturer's instructions  
148 ([www.yuekebio.com](http://www.yuekebio.com)). The proteins were stored at -80°C.

149

150 ***Assays for enzyme kinetics***

151 The vHPO activity of the purified enzymes was detected using previously described methods  
152 (Coupe, *et al.*, 2007). For enzymatic characterization, Cl<sup>-</sup>, Br<sup>-</sup>, and I<sup>-</sup>, which are considered  
153 potential substrates, were tested. The effect of pH on the enzymatic activities of the purified  
154 proteins was determined in the range of 6.0 to 10.0 for SjavBPO1 and 2.5 to 6.5 for SjavIPO1.  
155 The effect of temperature on these enzymes was determined over a range of 10°C to 60°C. Four  
156 replicates were analyzed for each condition to ensure the consistency of the experimental results.  
157 In each case, boiled purified recombinant enzymes were used as the negative control. All data  
158 were subjected to a one-way analysis of variance (one-way ANOVA) followed by a Student's  
159 *t*-test.

160 The small molecular compound HD-ZWM-163 used in the halogen addition experiment was  
161 provided by Professor Zhu Weiming from Ocean University of China. It is a type of alkaloid  
162 staurosporine extracted from actinomycetes *Streptomyces fradiae* 007 var. M315. Its molecular  
163 weight is 466 g/mol, with a purity of more than 98% (Supplementary Fig. S2). HD-ZWM-163  
164 replaced MCD in the above enzyme assay at 20°C for 12 h. The reactants were extracted three  
165 times using ethyl acetate and were dissolved in chromatographic methanol. The HPLC-UV test  
166 was performed with 75% methanol (v/v, 1.5% TFA; flow rate: 1 mL/min), and the peak samples  
167 were collected for the determination of the HPLC-MS.

168

169 ***Transcriptome sequencing***

170 Total RNA was extracted using an improved CTAB method (Gareth, *et al.*, 2006). A total amount  
171 of 3 µg RNA per sample was used as input material for the RNA sample preparations. Sequencing  
172 libraries were generated using NEBNext® Ultra™ RNA Library Prep Kit for Illumina® (NEB,  
173 USA) following the manufacturer's recommendations, and index codes were added to attribute  
174 sequences to each sample. The clustering of the index-coded samples was performed on a cBot  
175 Cluster Generation System using TruSeq PE Cluster Kit v3-cBot-HS (Illumina) according to the  
176 manufacturer's instructions. After cluster generation, the library preparations were sequenced on  
177 an Illumina HiSeq platform, and 125 bp/150 bp paired-end reads were generated. HTSeq v0.6.1  
178 was used to count the reads numbers mapped to each gene. The FPKM of each gene was then  
179 calculated based on the length of the gene and the reads count mapped to this gene.

180

## 181 **Results**

### 182 *Phylogenetic analysis of algal vHPO genes*

183 Novel transcriptomic sequencing data were obtained for 21 Rhodophyta and 19 Ochrophyta  
184 marine algal species (OneKP database), and re-sequencing genomic data for *S. japonica* were used  
185 to identify *vHPO* genes. Additionally, 104 new full-length candidate genes from 10 brown algal  
186 species and 18 genes from 12 red algal species were detected (Supplementary Fig. S1). There  
187 were 21 *vBPOs* and 68 *vIPOs* isolated from genomic and transcriptomic data for *S. japonica*. The  
188 homology comparison and structure prediction confirmed that these sequences all belonged to the  
189 *vHPO* superfamily.

190 Phylogenetic trees based on full-length amino acid sequences of *vHPO*-related genes from  
191 archaeal taxa, bacteria, fungi, and eukaryotic algae were constructed using Bayesian methods  
192 (only representative candidates were included). Based on this tree, all *vHPO* genes formed a  
193 monophyletic group sharing a common ancestor with the *vCPO* genes in fungi, after which they  
194 evolved independently in red and brown algae (Fig. 1). Red algae only have *vBPO* genes.  
195 However, brown algae contain *vBPOs* and *vIPOs*, which both have secondary endosymbiotic host  
196 origins. These two types of *vHPOs* were paralogues resulting from an ancestral gene duplication.  
197 Interestingly, brown alga *Ectocarpus siliculosus* has only one *vBPO* gene in its genome, whereas  
198 the closely related species *S. japonica* has 89 *vHPOs*. Based on the consensus tree, 21 *S. japonica*  
199 *vBPOs* were clustered into three groups (I–III), and 68 *vIPOs* were clustered into five groups  
200 (I–V). The large number of family members are expected to have been derived from recent  
201 tandem duplication events, which occurred after the differentiation of *Saccharina* and *Ectocarpus*.

202

### 203 *Characterization and confirmation of the functions of vHPO genes from S. japonica*

204 In this study, one *vBPO* (*SjavBPO1*) and one *vIPO* (*SjavIPO1*) were chosen to be over-expressed  
205 in *E. coli* to verify their encoding enzyme activities. This was the first functional analysis of these  
206 enzymes in *Saccharina*. Specificity of *SjavHPOs* was determined by assaying its activity in the  
207 presence of different potential substrates. The oxidation ability of halogen ions  $\text{Cl}^-$ ,  $\text{Br}^-$ , and  $\text{I}^-$   
208 were tested. These experiments demonstrated that the *SjavBPO1* enzyme exhibited oxidation  
209 activity for both  $\text{Br}^-$  and  $\text{I}^-$ , whereas *SjavIPO1* could only oxidize  $\text{I}^-$  (Table 1). Purified *SjavBPO1*

210 had a specific activity of 5861.1 U/mg and 2342.88 U/mg for Br<sup>-</sup> and I<sup>-</sup>, respectively. SjavIPO1  
211 had a specific activity of 333.6 U/mg for I<sup>-</sup>. These activities were almost the highest of those  
212 measured for algal vHPOs (Table 1). In addition, over 90% of the enzymatic activity was detected  
213 in SjavHPOs after having been stored at 4°C for 72 h, suggesting that the recombinant proteins  
214 were stable under the purification conditions tested.

215

216 Table 1. The protein activity of vHPOs in different organisms.

| Gene           | Species                      | Iron            | Specific activity<br>(U/mg) | Reference                        |
|----------------|------------------------------|-----------------|-----------------------------|----------------------------------|
| <i>SjavBPO</i> | <i>Saccharina japonica</i>   | Br <sup>-</sup> | 5861.1                      | This study                       |
| <i>SjavBPO</i> | <i>Saccharina japonica</i>   | I <sup>-</sup>  | 2342.9                      | This study                       |
| <i>SjavBPO</i> | <i>Saccharina japonica</i>   | I <sup>-</sup>  | 333.6                       | This study                       |
| <i>vBPO</i>    | <i>Corallina officinalis</i> | Br <sup>-</sup> | 9.9-469                     | Zhang, <i>et al.</i> , 2011      |
| <i>vBPO</i>    | <i>Corallina officinalis</i> | Br <sup>-</sup> | 450-5000                    | Coupe, <i>et al.</i> , 2007      |
| <i>vBPO</i>    | <i>Corallina pilulifera</i>  | Br <sup>-</sup> | 2.32-286                    | Shimonishi, <i>et al.</i> , 1998 |
| <i>vBPO</i>    | <i>Ascophyllum. nodosum</i>  | Br <sup>-</sup> | 50-250                      | Hartung, <i>et al.</i> , 2008    |
| <i>vBPO</i>    | <i>Laminaria digitata</i>    | Br <sup>-</sup> | 42                          | Colin, <i>et al.</i> , 2003      |
| <i>vBPO</i>    | <i>Laminaria digitata</i>    | I <sup>-</sup>  | 62                          | Colin, <i>et al.</i> , 2003      |
| <i>vIPO</i>    | <i>Laminaria digitata</i>    | I <sup>-</sup>  | 310                         | Colin, <i>et al.</i> , 2003      |

217

218 The activities of the two purified proteins under different temperatures and pH values were  
219 determined to elucidate their biological characteristics. Based on these experiments, the maximum  
220 activity of SjavBPO1 for Br<sup>-</sup> was at 20°C, whereas the activity was 68% and 93% of the maximum  
221 activity at 10°C and 25°C, respectively. The optimum temperature for I<sup>-</sup> was 25°C, with 78% and  
222 72% of the residual activity at 20°C and 30°C, respectively (Fig. 2A). For SjavIPO1, the optimum  
223 temperature was much higher (50°C), with 68% and 81% of the residual activity at 40°C and 60°C,  
224 respectively (Fig. 2B). The optimum pH for SjavBPO1 for both Br<sup>-</sup> and I<sup>-</sup> was 6.5, with the  
225 activity being 71% to 94% of the maximum activity at other pH values (6.0, 7.0, 8.0, 9.0, 10.0)  
226 (Fig. 2C). The optimum pH for SjavIPO1 was determined to be 3.0, and 58% to 99% of the



227 activity remained intact at pH values from 2.5 to 6.5 (Fig. 2D).

228

### 229 ***Halogen addition of SjavBPO to small-molecule compound***

230 A small-molecule compound (HD-ZWM-163) was used to validate the halogen addition activity  
231 of SjavBPO1. In Fig. 3A, a peak of a single compound appears, which is the unmodified  
232 compound HD-ZWM-163 (MW = 466 g/mol). The first peak in Fig. 3B and 3C was  
233 2-(N-Morpholino)ethanesulfonic acid (MES) in the reaction Buffer, and peak A and peak B were  
234 the derivatives of the halogen addition reaction. Peak B2 was approximately four times that of B1,  
235 confirming the effect of the SjavBPO1 protein on the HD-ZWM-163 enzymatic reaction. The  
236 samples of peaks A1, A2, B1, and B2 were then detected by mass spectrometry analysis.  
237 Compounds A1 and A2 were identified as monobromo-HD-ZWM-163 products (Supplementary  
238 Fig. S3), whereas B1 and B2 were dibromo-HD-ZWM-163 products (MW = 623 g/mol, Fig. 3D).  
239 In addition, the abundance ratio of peak 623:625:627 is approximately 1:2:1 and also confirms  
240 that compound B contain two Br atoms. After adding the SjavBPO1 protein, the production of B2  
241 was more obvious than that of B1, indicating that SjavBPO1 played a role in the compound  
242 HD-ZWM-163 dibromination reaction.

243

### 244 ***Expression differences of Saccharina vHPOs***

245 The expression of 89 *S. japonica* vHPO genes was determined in different generations  
246 (sporophytes and gametophytes), tissue (rhizoids, stipe, blade tip, blade pleat, blade base, and  
247 blade fascia), sexes (male and female gametophytes), and stress conditions (hyperthermia,  
248 hyposaline) (Fig. 4). In all normal and stress conditions, 26.1% (6/23) and 50% (33/66) of vBPOs  
249 and vIPOs were not detected, respectively. However, there were many constitutive vHPOs  
250 expressed in different tissues (14 vBPOs and four vIPOs), generations (nine vBPOs and eight  
251 vIPOs), sexes (six vBPOs and four vIPOs), and stress conditions (seven vBPOs and two vIPOs). It  
252 was determined that vHPOs were widely involved throughout the process of *S. japonica* growth,  
253 development, and environmental adaptation (Fig. 5).

254 The vBPOs and vIPOs identified in *S. japonica* showed diverse patterns of expression. The  
255 expression of vIPOs was more specific than was the expression of vBPOs (Fig. 6). There were 27  
256 vIPO and 16 vBPO genes expressed in sporophyte tissues. The specific expression ratio of vIPOs

257 (23/27, 85.2%) was 6.8 times higher than that of *vBPOs* (2/16, 12.5%). Sixteen *vBPOs* and 30  
258 *vIPOs* were expressed in different generations, and the specific expression ratios of *vIPOs* and  
259 *vBPOs* were 73.3% (22/30) and 43.8% (7/16), respectively. There were nine *vBPOs* and 11 *vIPOs*  
260 expressed in male and female gametophytes. The specific expression ratios of *vIPOs* and *vBPOs*  
261 were 63.6% (7/11) and 33.3% (3/9), respectively. Female gametophytes displayed a similar  
262 response under hyperthermia. The specific expression ratio of *vIPOs* (8/15, 53.3%) was higher  
263 than that of *vBPOs* (2/9, 22.2%). On the contrary, the gene number of constitutive expressed  
264 *vBPOs* was more than that of *vIPOs*, and expressed constitutive *vBPOs* exhibited higher  
265 expression levels than *vIPOs* (Fig. 5). For example, the total expression dose of *vBPOs* in different  
266 tissues was about  $10^2$ – $10^3$  times (27.1–520.1 times) that of *vIPOs*.

267 Considering the different generations, the average expression of sporophyte *vBPOs* (FPKM  
268 value = 3307.6) was much higher than that of gametophyte *vBPOs* (FPKM value = 12.7) ( $P =$   
269 0.001), whereas there was no significant difference in *vIPOs* between the two groups (FPKM  
270 value = 34.1 vs 45.2) (Fig. 7A). There were 26 *vHPOs* (7 *vBPOs* and 19 *vIPOs*) that were only  
271 expressed in sporophytes and three *vIPOs* that were only expressed in gametophytes. Among the  
272 sporophytes, some genes were only expressed in unique tissues, such as *vIPO55* in the rhizoids,  
273 *vIPO36* in the stipes, *vIPO62* in the blade bases, *vIPO7* in the blade tips, *vIPO11* in the blade  
274 pleats, and *vIPO60* in the blade fascia. The expression levels were higher in the blade tips than  
275 other sporophyte samples, followed by the blade fascia, rhizoids, blade bases, blade pleats, and  
276 stipes (Fig. 7B).

277 The expression of *vHPOs* differed between male and female gametophytes. Few genes were  
278 expressed during the gametophyte stage, including nine *vBPOs* and 11 *vIPOs*. One *vBPO* and  
279 three *vIPOs* were specifically expressed in male gametophytes, whereas two *vBPOs* and four  
280 *vIPOs* were specifically expressed in female gametophytes. Some of the constitutively expressed  
281 genes were highly expressed in female gametophytes (*vBPO18*,  $P = 0.02$ ), and some were highly  
282 expressed in male gametophytes (*vIPO37*,  $P < 0.01$ ) (Fig. 8).

283 The expression of *vHPOs* under abiotic stress was significantly upregulated in female  
284 gametophytes. Compared to gametophyte samples cultured under normal condition, three *vBPOs*  
285 (*vBPO6*, *vBPO7*, and *vBPO21*) and three *vIPOs* (*vIPO38*, *vIPO55*, and *vIPO18*) were expressed  
286 under hyposaline induction; two *vBPOs* (*vBPO12*, *vBPO21*) and eight *vIPOs* (*vIPO9*, *vIPO13*,

287 *vIPO15*, *vIPO17*, *vIPO18*, *vIPO19*, *vIPO49*, and *vIPO58*) expressed under hyperthermia (Fig. 9).  
288 However, the expression of the *vHPOs* in gametophytes did not change significantly under the  
289 normal circadian rhythm (12 h irradiation vs. 12 h darkness) or in sporophytes under hyposaline or  
290 hyperthermia stresses.

291

## 292 **Discussion**

### 293 *The origin and evolution of vHPOs contributed to the differentiation of brown algal vBPO and* 294 *vIPO genes*

295 Our new data allow for the identification of *vHPO* genes widely distributed among different red  
296 (such as Gigartinales, Gracilariales, and Halymeniales) and brown (such as Laminariales,  
297 Desmarestiales, Ishigeales, and Fucales) algal taxa (Fig. 1). Among the *vHPO* gene family, *vCPO*  
298 appeared first in fungi, followed by *vBPO* and *vIPO* with functional specialization. The eukaryotic  
299 algal *vHPOs* clustered with the *vCPO* genes of fungi, indicating its endosymbiotic host origin. The  
300 differentiation time of *vBPOs* and *vIPOs* could be later than that of the *vCPOs*, which might have  
301 occurred because of variations in the earth's environment. Previous results have demonstrated the  
302 independent evolution of *vHPOs* in red algae and brown algae (Ye, *et al.*, 2015). This study  
303 obtained several *vHPO* genes from several algal species and performed a comprehensive  
304 phylogenetic analysis using a wide range of algal species, clarifying their evolutionary  
305 relationships.

306 Furthermore, there are diverse gene duplications among most red and brown algal taxa, as they  
307 have undergone gene duplications subsequently at different evolutionary time scales. Because  
308 many brown algae were included in the analysis, we confirmed that gene duplications occurred  
309 both before (different groups of *SjavBPOs* and *SjavIPOs*) and after species differentiation (such as  
310 *SjavBPO1* and *SjavBPO2*, *SjavIPO1* and *SjavIPO2*). This suggested that the *vHPO* gene family in  
311 brown algae recently underwent, and perhaps is still undergoing, rapid evolution. Through  
312 genomic sequencing analysis, *E. siliculosus* has only one *vBPO*. However, in Laminariales species,  
313 the gene family expanded dramatically, especially in the genera *Saccharina* and *Laminaria*. As we  
314 know, the iodine content is much higher in these two genera. Vinogradov (1953) demonstrated that  
315 the iodine content in *L. digitata* on the west coast of France was as high as 1.7%. Ji (1963) showed  
316 that the iodine content in *S. japonica* was also greater than 1%. The appearance of functional

317 *vHPOs* indicated the more efficient immobilization of halogen.

318

319 ***The diverse enzyme characteristics of SjavBPO1 and SjavIPO1 were conducive to better***  
320 ***environmental adaption***

321 The enzyme activities of *S. japonica* vBPO1 and vIPO1 were confirmed (Fig. 2), verifying the  
322 authenticity of the pathways as determined through a bioinformatical approach. The oxidation  
323 activity of SjavBPO1 is now known as the highest activity of vBPO and vIPO proteins, compared  
324 to those measured for algal vHPOs listed in Table 1. This also suggested the massive accumulation  
325 of halogen in *S. japonica*. Under the same experimental conditions, the SjavBPO1 protein  
326 exhibited no activity with Cl<sup>-</sup>, and the specific activity with Br<sup>-</sup> was three times that of the activity  
327 with I<sup>-</sup>. Meanwhile, the SjavIPO1 protein only had the activity with I<sup>-</sup>. This demonstrated the  
328 functional differentiation and specialization between SjavBPO and SjavIPO.

329 The biochemical characteristics of SjavBPO1 and SjavIPO1 differed considerably. The optimal  
330 pH value for SjavBPO1 (pH = 6.5) was similar to that of brown alga *L. digitata* vBPO and vIPO  
331 (optimal pH = 5.5; Colin, *et al.*, 2003) and red alga *Corallina officinalis* vBPO (optimal pH =  
332 7.0–7.5; Coupe, *et al.*, 2007); SjavIPO1 activity was lower (optimal pH = 3.0) (Fig. 2). In contrast,  
333 the SjavIPO1 protein was active up to 60°C, which was the optimal temperature for maximum  
334 activity, similar to *L. digitata* vIPO (optimal temperature = 50°C; Colin, *et al.*, 2003) and *C.*  
335 *officinalis* vBPO (optimal temperature 65°C–70°C; Coupe, *et al.*, 2007). The SjavBPO1 maximum  
336 activity was considerably lower at 20°C and 25°C for Br<sup>-</sup> and I<sup>-</sup>, respectively; this is similar to the  
337 optimal temperature for *L. digitata* vBPO (30°C) for I<sup>-</sup> (Colin, *et al.*, 2003). The variation of  
338 optimum conditions for different proteins indicates that they may play a role under different  
339 environmental conditions. Additionally, more than 40% of the maximum activity remained intact  
340 in the temperature range of 20°C–50°C for both SjavBPO1 and SjavIPO1 enzymes. For pH  
341 stability, over 70% of the maximum activity was in the range of 6.0–10.0 for SjavBPO1, and over  
342 57% of the maximum activity was in the range of 2.5–6.5 for SjavIPO1. These results suggested  
343 the high stability of SjavHPO enzymes, which remain active under a wide range of variable  
344 conditions. The iodine content of kelp increases with seawater depth (Saenko, *et al.*, 1978) and  
345 differs between growing seasons (Ar Gall, *et al.*, 2004). In the present study, only two  
346 representative SjavHPOs were analyzed. The dozens of remaining proteins in *S. japonica* might

347 exhibit different biochemical characteristics. These characteristics could help this species to use  
348 halogen and facilitate signal transduction and self-defense under different environmental  
349 conditions.

350

351 ***The complex regulation of vHPOs was a driving force for the sophisticated system evolution in***  
352 ***brown algae***

353 The *SjavHPO* gene expression showed significant differences in various tissues, during different  
354 developmental stages, and under different types of stress (Fig. 4). Firstly, a large number of genes  
355 were not transcribed in the tested samples, which may be redundant gene backup, or were only  
356 expressed under special conditions. In contrast, the constitutively expressed genes maintained  
357 basic halogen metabolism under different conditions (Fig. 5). Halogen compounds have important  
358 ecological and physiological value for algae, such as free-oxygen cleaning and antimicrobial  
359 defense (Renirie, *et al.*, 2008; Hansen, *et al.*, 2003). They form an important source of bromine to  
360 the troposphere and lower stratosphere, and they contribute significantly to the global budget of  
361 halogenated hydrocarbons (Wever and van der Horst 2013). Additionally, constitutively expressed  
362 vHPOs have great physiological and ecological significance.

363 The expression of *vIPOs* was more specific than that of *vBPOs* in different tissues, generations,  
364 sexes, and under hyperthermia stress (Fig. 6). However, the expression doses of *vBPOs* were far  
365 higher than those of *vIPOs* in sporophytes (Fig. 4). With respect to the higher specific activity of  
366 *SjavBPO1* than that of *SjavIPO1* (Table 1), *vBPOs* were supposed to be the core of *S. japonica*  
367 halogen metabolism, and responsible for the basal halogen accumulation. In contrast, *vIPOs* are  
368 mainly involved in generation differentiation, tissue differentiation, sex differentiation and stress  
369 regulation.

370 *S. japonica* possess heteromorphic haploid-diploid life cycles with a macroscopic thallus  
371 sporophyte and microscopic gametophyte generation. The gametophyte is similar to some  
372 filamentous brown algae, with an isomorphic haploid-diploid filamentous generation (Cock, *et al.*,  
373 2014; Bartsch, *et al.*, 2008). Therefore, the comparison between *S. japonica* sporophytes and  
374 gametophytes might provide an explanation for the evolution of brown algae from unicellular to  
375 multicellular organisms (Chi, *et al.*, 2017). The expression level was higher in sporophytes than in  
376 gametophytes (Fig. 7A). This differs from previous studies (Ye, *et al.*, 2015), likely because we

377 annotated more *Saccharina vHPO* genes (89 *vHPOs* in our study vs. 76 *vHPOs* in Ye, *et al.*, 2015),  
378 and the materials were derived from different *Saccharina* strains. The higher expression in the  
379 blade tips (Fig. 7B) is consistent with the higher content of iodine elements in Laminariales distal  
380 blades (Shaw, 1962; Ar Gall, *et al.*, 2004; Küpper, *et al.*, 2008). The blade tips are more sensitive  
381 to environmental stresses and pathogen infections than are the regions beneath the thalli (Küpper,  
382 *et al.*, 1998). This increased gene expression led to greater halogen accumulation. The reserved  
383 material might move toward the halogen-requiring basal meristems through the highly specialized  
384 elongated sieve elements (Amat and Srivastava, 1985). The differences in gene expression and  
385 synthetic product translocation are conducive to the functional differentiation of tissues and  
386 necessary for the supply of halo-containing compounds in brown macroalgae. In addition,  
387 *SjavHPO* expression was significantly upregulated in the gametophytes under stress, such as  
388 hyperthermia and hyposaline conditions (Fig. 9), indicating that *vHPOs* present in *S. japonica*  
389 were involved in stress resistance. However, the expression level in sporophytes did not change  
390 under the same abiotic stresses. One possible explanation is that the gametophyte stage is more  
391 vulnerable to external stress than is the sporophyte stage.

392

### 393 ***Algal vHPOs have important industrial and pharmaceutical values***

394 Halo-containing compounds, such as acetogenins (anti-microbial activity), and indoles  
395 (anti-inflammatory and anti-cancer activities) could have medical applications (Butler, 1998).  
396 However, conventional chemical manufactures generate potentially harmful byproducts. For  
397 example, synthetic bromination typically yields approximately 50% of the remaining bromine in  
398 the form of waste compounds. Currently, biohalogenation approaches are particularly valuable as  
399 an alternative, which could markedly reduce the amount of halogen pollutants produced. For  
400 example, using a biotransformation approach employing haloperoxidases to produce drugs such as  
401 Vancomycin, Maracen A, and cryptophycins (all halogen-containing compounds) could markedly  
402 reduce toxic levels in wastewater (Coupe, *et al.*, 2007). Therefore, the halogenation of *SjavBPO*  
403 on small molecule compounds (Fig. 3) could provide a more efficient and convenient method for  
404 biohalogenation, which has important economic value and environmental significance.

405

406 In conclusion, the huge diversities in gene family members, enzyme catalytic activities,

407 biochemical characteristics, and gene expression patterns of brown algal *vBPOs* and *vIPOs*  
408 exhibited great differences between large individual parenchyma (sporophyte, 2n) and single-row  
409 filamentous cells (gametophyte, n) regarding biochemistry, physiology, and ecology. The  
410 Phaeophyceae-exclusive *vIPOs*, with a large number of gene expansions and differential  
411 expression, and function in scavenging free oxygen, play a crucial role in the evolution of  
412 unicellular organisms (such as filamentous *S. japonica*) into multicellular organisms (such as *S.*  
413 *japonica* thalli). The deep resolution of the *vHPO* gene family in brown algae has important  
414 biological, ecological, and economic significance.

415

### 416 **Figure legends**

417 Figure 1. Bayesian phylogenetic tree based on the translated amino acids of *vHPO* with bootstrap  
418 values (when >50%) indicated at the nodes. Brown algal *vHPOs* originated from eukaryotic hosts,  
419 and underwent gene duplication in their common ancestor. Brown algal *vBPOs* were clustered into  
420 3 Group (I, II and III), and *vIPOs* were clustered into 5 Group (I to V). All *vHPO* sequences were  
421 obtained from GenBank or OneKP databases (Supplementary Fig. S1).

422

423 Figure 2. Effects of temperature and pH on activity of SjavBPO1 and SjavIPO1. A. Enzyme  
424 activity of SjavBPO1 at 20°C for Br<sup>-</sup> and 25°C for I<sup>-</sup> were set to 100%, respectively. B. Enzyme  
425 activity of SjavBPO1 at pH 6.5 for both Br<sup>-</sup> and I<sup>-</sup> were set to 100%. C. Enzyme activity of  
426 SjavIPO1 at 50°C for I<sup>-</sup> was set to 100%. D. Enzyme activity of SjavIPO1 at pH 3.0 for I<sup>-</sup> was set  
427 to 100%. Data represent means ± SD of four independent experiments.

428

429 Figure 3. Halogen addition of SjavBPO1 to HD-ZWM-163. (A) The HPLC result of  
430 HD-ZWM-163 (flow rate: 1 mL/min; tR = 3.70 min). (B) The HPLC result of HD-ZWM-163 in  
431 reaction buffer without SjavBPO1 (tA1 = 4.91 min, tB1 = 7.51 min). (C) The HPLC result of  
432 HD-ZWM-163 in reaction buffer with SjavBPO1 (tA2 = 4.91 min, tB2 = 7.51 min). Peaks A1, B1,  
433 A2, and B2 were the derivatives of the halogen addition reaction. (D) The ESI-MS result of B1 in  
434 (B) and B2 in (C). Compounds B1 and B2 were dibromo-HD-ZWM-163 products.

435

436 Figure 4. The transcriptional expression of 89 *S. japonica vHPO* genes in different generations

437 (sporophytes and gametophytes), tissue (rhizoids, stipe, blade tip, blade pleat, blade base, and  
438 blade fascia), sexes (male and female gametophytes) and stress conditions (hyperthermia,  
439 hyposaline).

440

441 Figure 5. Constitutive expressed *SjavHPOs* in different tissues (A), sexes (B) and stress conditions  
442 (C).

443

444 Figure 6. The specific expression gene ratios of *vBPOs* and *vIPOs* in different tissues, generations,  
445 sexes and under hyperthermia condition. The expression of *vIPOs* was more specific than that of  
446 *vBPOs*.

447

448 Figure 7. The transcriptional expression of *vBPOs* and *vIPOs* in different sexes (A) and tissues (B).

449 A. The average expression dose of sporophyte *vBPOs* was much higher than that of gametophyte  
450 *vBPOs*. The difference between *vIPO* from sporophyte and gametophyte was not significant. B.

451 The highest total expression dose of *vHPOs* was in blade tip, followed by blade fascia, rhizoids,  
452 blade base, blade pleat, and stipe.

453

454 Figure 8. The transcriptional expression of nine *vBPOs* and 11 *vIPOs* in female and male  
455 gametophytes. Three *vBPOs* and four *vIPOs* genes were highly expressed in female gametophytes,  
456 and one *vBPOs* and four *vIPOs* genes were highly expressed in male gametophytes.

457

458 Figure 9. The up-regulated and down-regulated gene ratio of *vBPOs* and *vIPOs* under hyposaline  
459 and hyperthermia stresses in female gametophytes.

460

#### 461 **Supplementary data**

462 Supplemental Figure S1. List of *vHPO* sequences used for phylogenetic analysis.

463 Supplemental Figure S2. The chemical structure of small-compound HD-ZWM-163.

464 Supplemental Figure S3. The ESI-MS result of peak A1 in Figure 3B and peak A2 in Figure 3C.

465

#### 466 **Acknowledgements**



467 This work was supported by the National Natural Science Foundation of China (NSFC No.  
468 41376143), Leading Talents Program in Taishan Industry of Shandong Province, Leading Talents  
469 Program in Entrepreneurship and Innovation of Qingdao, China-ASEAN Maritime Cooperation  
470 Fund “China-ASEAN Center for Joint Research and Promotion of Marine Aquaculture  
471 Technology”, and China Agriculture Research System (CARS-50).

472

## 473 **References**

474 **Amat MA, Srivastava LM.** 1985. Translocation of iodine in *Laminaria saccharina* (Phaeophyta).  
475 *J Phycol* **21**, 330–333.

476 **Ar Gall E, Küpper FC, Kloareg B.** 2004. A survey of iodine contents in *Laminaria digitata*. *Bot*  
477 *Mar* **47**, 30–37.

478 **Barnett P, Hemrika W, Dekker HL, Muijsers AO, Renirie R, and Wever R.** 1998. Isolation,  
479 characterization, and primary structure of the vanadium chloroperoxidase from the fungus  
480 *Embellisia didymospora*. *J Biol Chem* **273**, 23381–23387.

481 **Brinkhuis BH, Levine HG, Schlenk CG, Tobin S.** 1987. *Laminaria* cultivation in the Far East  
482 and North America. In *Seaweed Cultivation for Renewable Resources* (Bird, K.T. & Benson,  
483 P.H., editors), 107–146. Elsevier, Amsterdam, The Netherlands.

484 **Butler A.** 1998. Vanadium haloperoxidases. *Current Opinion in Chemical Biology* **2(2)**, 279–285.

485 **Charrier B, Le Bail A, de Reviere B.** 2012. Plant Proteus: brown algal morphological plasticity  
486 and underlying developmental mechanisms. *Trends Plant Sci* **17(8)**, 468–477.

487 **Chi S, Liu T, Wang X, Wang R, Wang S, Wang G, Shan G, Liu C.** 2017. Functional genomics  
488 analysis reveals the biosynthesis pathways of important cellular components (alginate and  
489 fucoidan) of *Saccharina*. *Curr Genet* doi: 10.1007/s00294-017-0733-4.

490 **Colin C, Leblanc C, Michel G, Wagner E, Leize-Wagner E, van Dorsselaer A, Potin P.** 2005.  
491 Vanadium-dependent iodoperoxidases in *Laminaria digitata*, a novel biochemical function  
492 diverging from brown algal bromoperoxidases, *J Biol Inorg Chem* **10**, 156–166.

493 **Colin C, Leblanc C, Wagner E, Delage L, Leize-Wagner E, Van Dorsselaer A, Kloareg**  
494 **B, Potin P.** 2003. The brown algal kelp *Laminaria digitata* features distinct bromoperoxidase  
495 and iodoperoxidase activities. *J Biol Chem* **278(26)**, 23545–23552.

496 **Coupe EE, Smyth MG, Fosberry AP.** 2007. The dodecameric vanadium-dependent

- 497 haloperoxidase from the marine algae *Corallina officinalis*: Cloning, expression, and refolding  
498 of the recombinant enzyme. *Protein Expression & Purification* **52(2)**, 265–272.
- 499 **de Boer E, Tromp MGM, Plat H, Krenn BE, Wever R.** 1986. Vanadium (V) as an essential  
500 element for haloperoxidase activity in marine brown algae: Purification and characterization of  
501 a vanadium (V)-containing bromoperoxidase from *Laminaria saccharina*. *Biochim Biophys*  
502 *Acta* **872**, 104–115.
- 503 **Fernández-Fueyo E, van Wingerden M, Renirie R, Wever R, Ni Y, Holtmann D, Hollmann F.**  
504 2015. Chemoenzymatic Halogenation of Phenols by using the Haloperoxidase from *Curvularia*  
505 *inaequalis*. *Chemcatchem* **7(24)**, 4035–4038.
- 506 **Frank A, Seel CJ, Groll M, Gulder T.** 2016. Characterization of a Cyanobacterial  
507 Haloperoxidase and Evaluation of its Biocatalytic Halogenation Potential. *Chembiochem*  
508 **17(21)**, 2028–2032.
- 509 **Gribble GW.** 2004. Natural organohalogens : a new frontier for medicinal agents. *Journal of*  
510 *Chemical Education* **81(10)**, 1441.
- 511 **Hansen EH, Albertsen L, Schäfer T, Johansen C, Frisvad JC, Molin S, Gram L.** 2003.  
512 *Curvularia* haloperoxidase: antimicrobial activity and potential application as a surface  
513 disinfectant. *Applied & Environmental Microbiology* **69(8)**, 4611–4617.
- 514 **Isupov MN, Dalby AR, Brindley AA, Izumi Y, Tanabe T, Murshudov GN, Littlechild JA.**  
515 2000. Crystal structure of dodecameric vanadium-dependent bromoperoxidase from the red  
516 algae *Corallina officinalis*. *J Mol Biol* **299**, 1035–1049.
- 517 **Itoh N.** 1986. Characterization of nonheme type bromoperoxidase in *Corallina pilulifera*. *J Biol*  
518 *Chem* **261**, 5194–5200.
- 519 **Itoh N.** 1987a. Characterization of nonheme iron and reaction mechanism of bromoperoxidase in  
520 *Corallina pilulifera*. *J Biol Chem* **262**, 11982–11987.
- 521 **Itoh N, Izumi Y, Yamada H.** 1985. Purification of bromoperoxidase from *Corallina pilulifera*.  
522 *Biochem Biophys Res Commun* **131**, 428–435.
- 523 **Ji MH.** 1963. Studies on the chemical composition of the Chinese economic brown seaweeds - II.  
524 Seasonal variations in the main chemical components of *Laminaria japonica*, *Sargassum*  
525 *pallidum* and *Sargassum kjellmanianum* from the north China (in Chinese). *Oceanologia et*  
526 *limnologia sinica* **5(1)**, 1–10.

- 527 **Küpper FC, Carpenter L, McFiggans GB, et al.** 2008. Iodide accumulation provides help with  
528 an inorganic antioxidant impacting atmospheric chemistry. *Proc Natl Acad Sci USA* **105**,  
529 6954–6958.
- 530 **Küpper FC, Schweiger N, Ar Gall E, Legendre J-M, Vilter H, Kloareg B.** 1998. Iodine uptake  
531 in Laminariales involves extracellular, haloperoxidase-mediated oxidation of iodide. *Planta* **207**,  
532 163–171.
- 533 **La Barre S, Potin P, Leblanc C, Delage L.** 2010. The halogenated metabolism of brown algae  
534 (Phaeophyta), its biological importance and its environmental significance. *Mar Drugs* **8(4)**,  
535 988–1010.
- 536 **Leblanc C, Colin C, Cosse A, et al.** 2006. Iodine transfers in the coastal marine environment:  
537 the key role of brown algae and of their vanadium-dependent haloperoxidases. *Biochimie* **88(11)**,  
538 1773.
- 539 **Littlechild J, Garcíarodríguez E, Dalby A, et al.** 2002. Structural and functional comparisons  
540 between vanadium haloperoxidase and acid phosphatase enzymes. *Journal of Molecular*  
541 *Recognition* **15(5)**, 291–296.
- 542 **Lüning K.** 1985. *Meeresbotanik: verbreitung, ökophysiologie und nutzung der marinen*  
543 *makroalgen*. Thieme Verlag, Stuttgart, Germany.
- 544 **Manley SL, Barbero PE.** 2001. Physiological constraints on bromoform (CHBr<sub>3</sub>) production by  
545 *Ulva lactuca* (Chlorophyta). *Limnology & Oceanography* **46(6)**, 1392–1399.
- 546 **Ohshiro T, Nakano S, Takahashi Y, Suzuki M, Izumi Y.** 1999. Occurrence of bromoperoxidase  
547 in the marine green macro-alga, *Ulva lactuca*, and emission of volatile brominated methane by  
548 the enzyme. *Phytochemistry* **52(7)**, 1211–1215.
- 549 **Ohshiro T, Littlechild J, Garcia-Rodríguez E, Isupov MN, Iida Y, Kobayashi T, Izumi Y.**  
550 2004. Modification of halogen specificity of a vanadium-dependent bromoperoxidase. *Protein*  
551 *Science* **13**, 1566–1571.
- 552 **Page RD.** 1996. TREEVIEW: An application to display phylogenetic trees on personal computers.  
553 *Computer Applications in the Biosciences* **12**, 357–358.
- 554 **Plat H, Krenn BE, Wever R.** 1987. The bromoperoxidase from the lichen *Xanthoria parietina* is  
555 a novel vanadium enzyme. *Biochemical Journal* **248(1)**, 277–279.
- 556 **Posada D, Crandall KA.** 1998. MODELTEST: testing the model of DNA substitution.

- 557      Bioinformatics **14**, 817–818.
- 558      **Renirie R, Dewilde A, Pierlot C, Wever R, Hober D, Aubry JM.** 2008. Bactericidal and  
559      virucidal activity of the alkalophilic P395D/L241V/T343A mutant of vanadium  
560      chloroperoxidase. *Journal of Applied Microbiology* **105(1)**, 264–270.
- 561      **Ronquist F, Huelsenbeck JP.** 2003. Mrbayes 3: Bayesian phylogenetic inference under mixed  
562      models. *Bioinformatics* **19(12)**, 1572–1574.
- 563      **Sabuzi F, Churakova E, Galloni P, Wever R, Hollmann F, Floris B, Conte V.** 2015. Thymol  
564      Bromination–A Comparison between Enzymatic and Chemical Catalysis. *European Journal of*  
565      *Inorganic Chemistry* **21**, 3519–3525.
- 566      **Saenko GN, Kravtsova YY, Ivaneneko VV, Sheludko SI.** 1978. Concentration of Iodine and  
567      Bromine by Plants in the Seas of Japan and Okhotsk, *Marine Biology* **47**, 243–250.
- 568      **Shaw TI.** 1962. Halogens. In Lewin RA (ed.). *Physiology and Biochemistry of Algae*, Academic  
569      Press, New York and London pp247–253.
- 570      **Sheffield DJ, Harry T, Smith AJ, Rogers LJ.** 1993. Purification and characterization of the  
571      vanadium bromoperoxidase from the macroalga *Corallina officinalis*. *Phytochemistry* **32(1)**,  
572      21–26.
- 573      **Shimonishi M, Kuwamoto S, Inoue H, Wever R, Ohshiro T, Izumi Y, Tanabe T.** 1998. Cloning  
574      and expression of the gene for a vanadium-dependent bromoperoxidase from a marine  
575      macro-alga, *Corallina pilulifera*. *Febs Letters* **428(1-2)**, 105–110.
- 576      **Suthiphongchai T, Boonsiri P, Panijpan B.** 2008. Vanadium-dependent bromoperoxidases from  
577      *Gracilaria* algae. *Journal of Applied Phycology* **20(3)**, 271–278.
- 578      **Thompson JD, Gibson TJ, Plewniak F, Jeanmougin F, Higgins DG.** 1997. The ClustalX  
579      windows interface: flexible strategies for multiple sequence alignment aided by quality analysis  
580      tools. *Nucleic Acids Research* **24**, 4876–4882.
- 581      **van Schijndel JWPM, Vollenbroek EGM, Wever R.** 1993. The chloroperoxidase from the  
582      fungus *Curvularia inaequalis*, a novel vanadium enzyme. *Biochim Biophys Acta* **1161**,  
583      249–256.
- 584      **Vilter H.** 1984. Peroxidases from phaeophyceae: A vanadium(V)-dependent peroxidase from  
585      *Ascophyllum nodosum*. *Phytochemistry* **23(7)**, 1387–1390.
- 586      **Vinogradov AP.** 1953. The elementary chemical composition of marine organisms. *Sears*

- 587 Foundation for Marine Research, Yale University, 647pp.
- 588 **Vreeland V, Ng KL, Epstein L.** 1998. cDNA sequence and active recombinant vanadium  
589 bromoperoxidase from *Fucus* embryos. *Mol BiolCell* **9**, 1043.
- 590 **Weichold V, Milbredt D, van Pée KH.** 2016. Specific enzymatic halogenation-from the  
591 discovery of halogenated enzymes to their applications in vitro and in vivo. *Angew Chem Int*  
592 *Ed Engl* **55(22)**, 6374–6389.
- 593 **Wever R, Plat H, de Boer E.** 1985. Isolation procedure and some properties of the  
594 bromoperoxidase from the seaweed *Ascophyllum nodosum*. *Biochim Biophys Acta* **830**,  
595 181–186.
- 596 **Wever R, Tromp MGM, Krenn BE, Marjani A, Tol MV.** 1991. Brominating activity of the  
597 seaweed *Ascophyllum nodosum*: impact on the biosphere. *Environmental Science and*  
598 *Technology (USA)* **25(3)**, 446–449.
- 599 **Wever R, van der Horst MA.** 2013. The role of vanadium haloperoxidases in the formation of  
600 volatile brominated compounds and their impact on the environment. *Dalton Trans* **42(33)**,  
601 11778–11786.
- 602 **Weyand M, Hecht HJ, Kieß M, Liaud MF, Vilter H, Schomburg D.** 1999. X-ray structure  
603 determination of a vanadium-dependent haloperoxidase from *Ascophyllum nodosum* at 2.0 Å  
604 resolution. *J Mol Biol* **293**, 595–611.
- 605 **Ye N, Zhang X, Miao M, et al.** 2015. *Saccharina* genomes provide novel insight into kelp  
606 biology. *Nat Commun* **6**, 6986.



# Figure 1

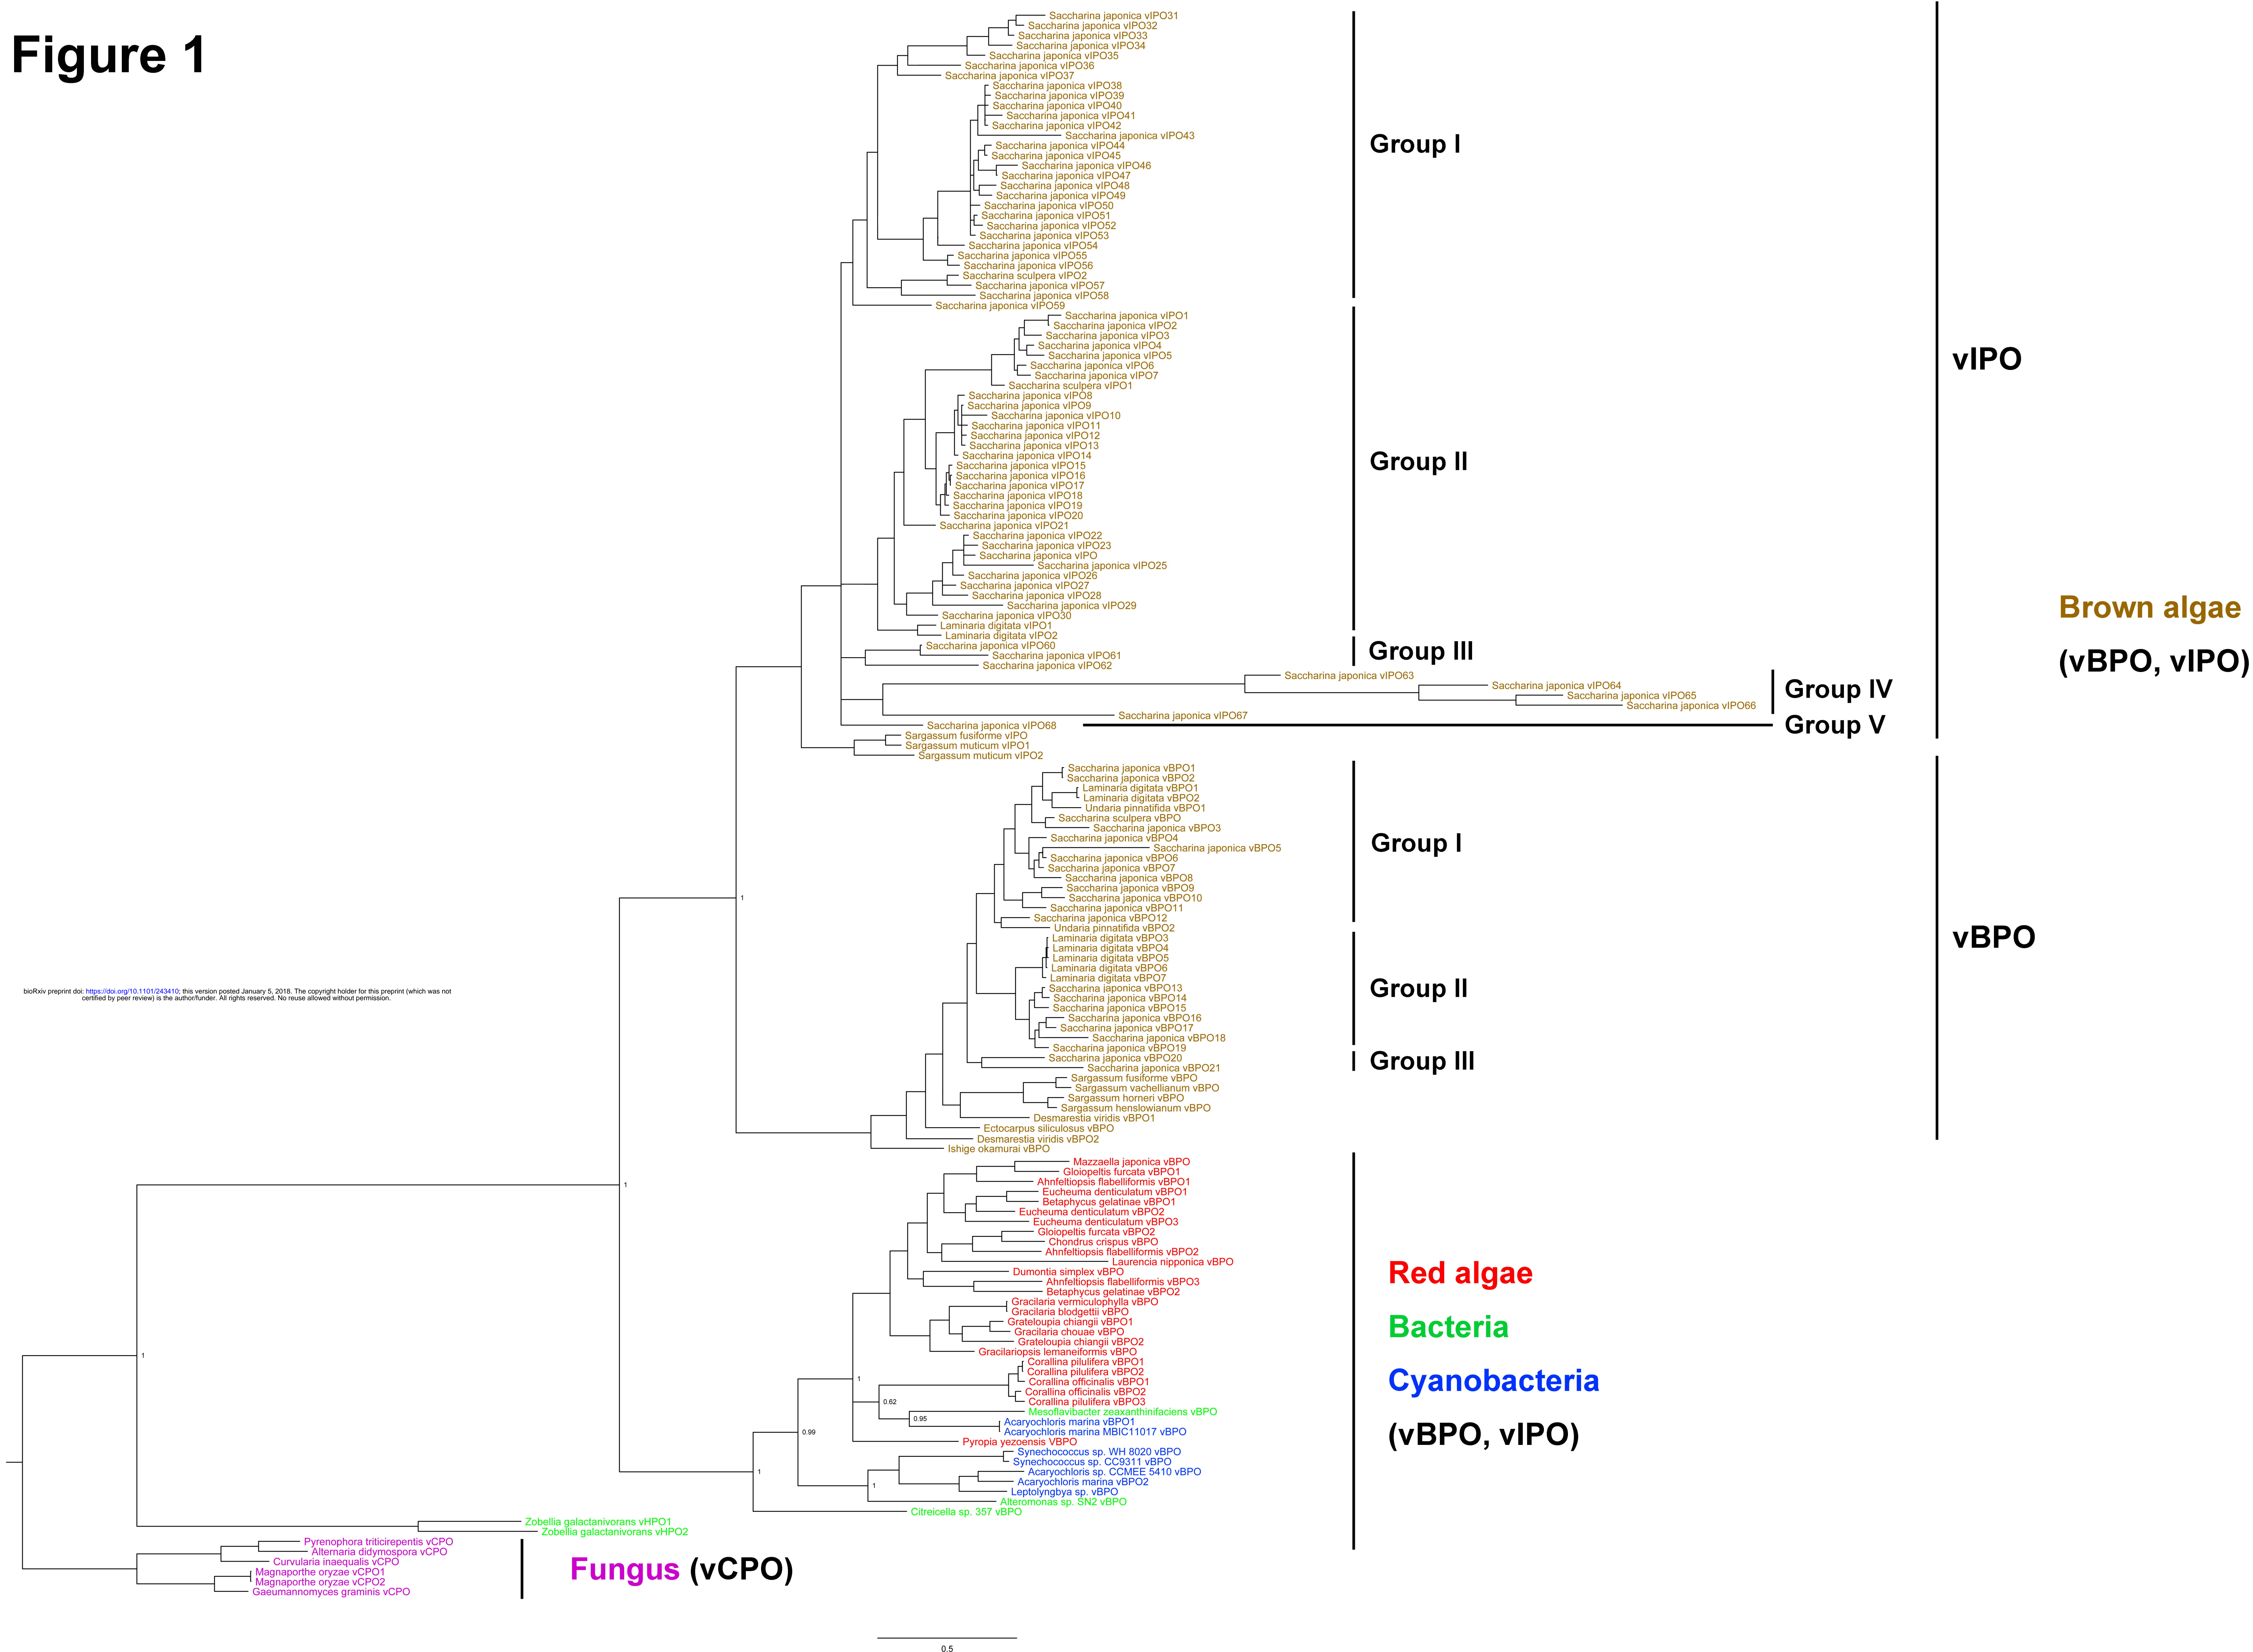

bioRxiv preprint doi: <https://doi.org/10.1101/243410>; this version posted January 5, 2018. The copyright holder for this preprint (which was not certified by peer review) is the author/funder. All rights reserved. No reuse allowed without permission.



**Figure 2**

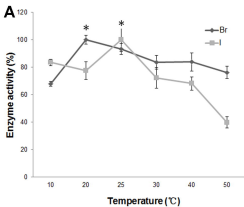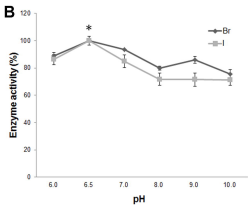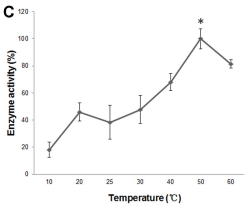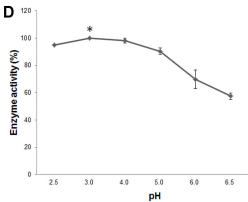

# Figure 3

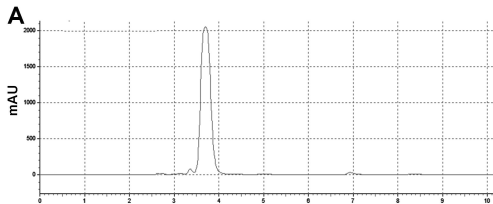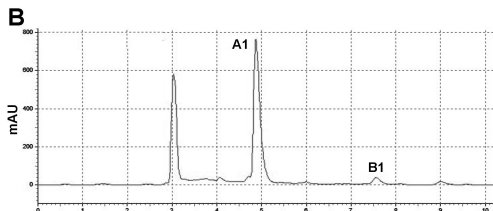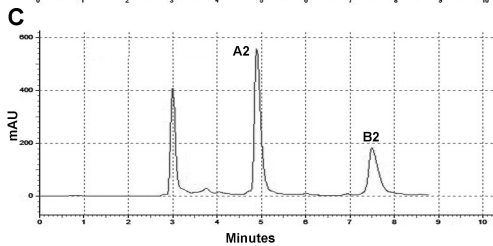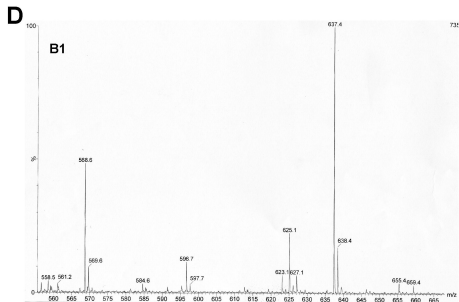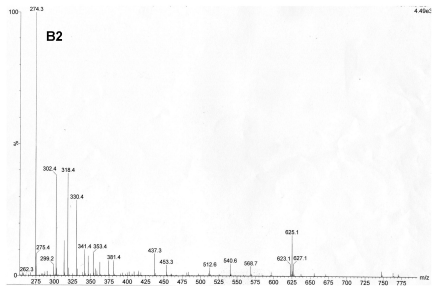



# Figure 4

Color Key

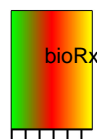

bioRxiv preprint doi: <https://doi.org/10.1101/243410>; this version posted January 5, 2018. The copyright holder for this preprint (which was not certified by peer review) is the author/funder. All rights reserved. No reuse allowed without permission.

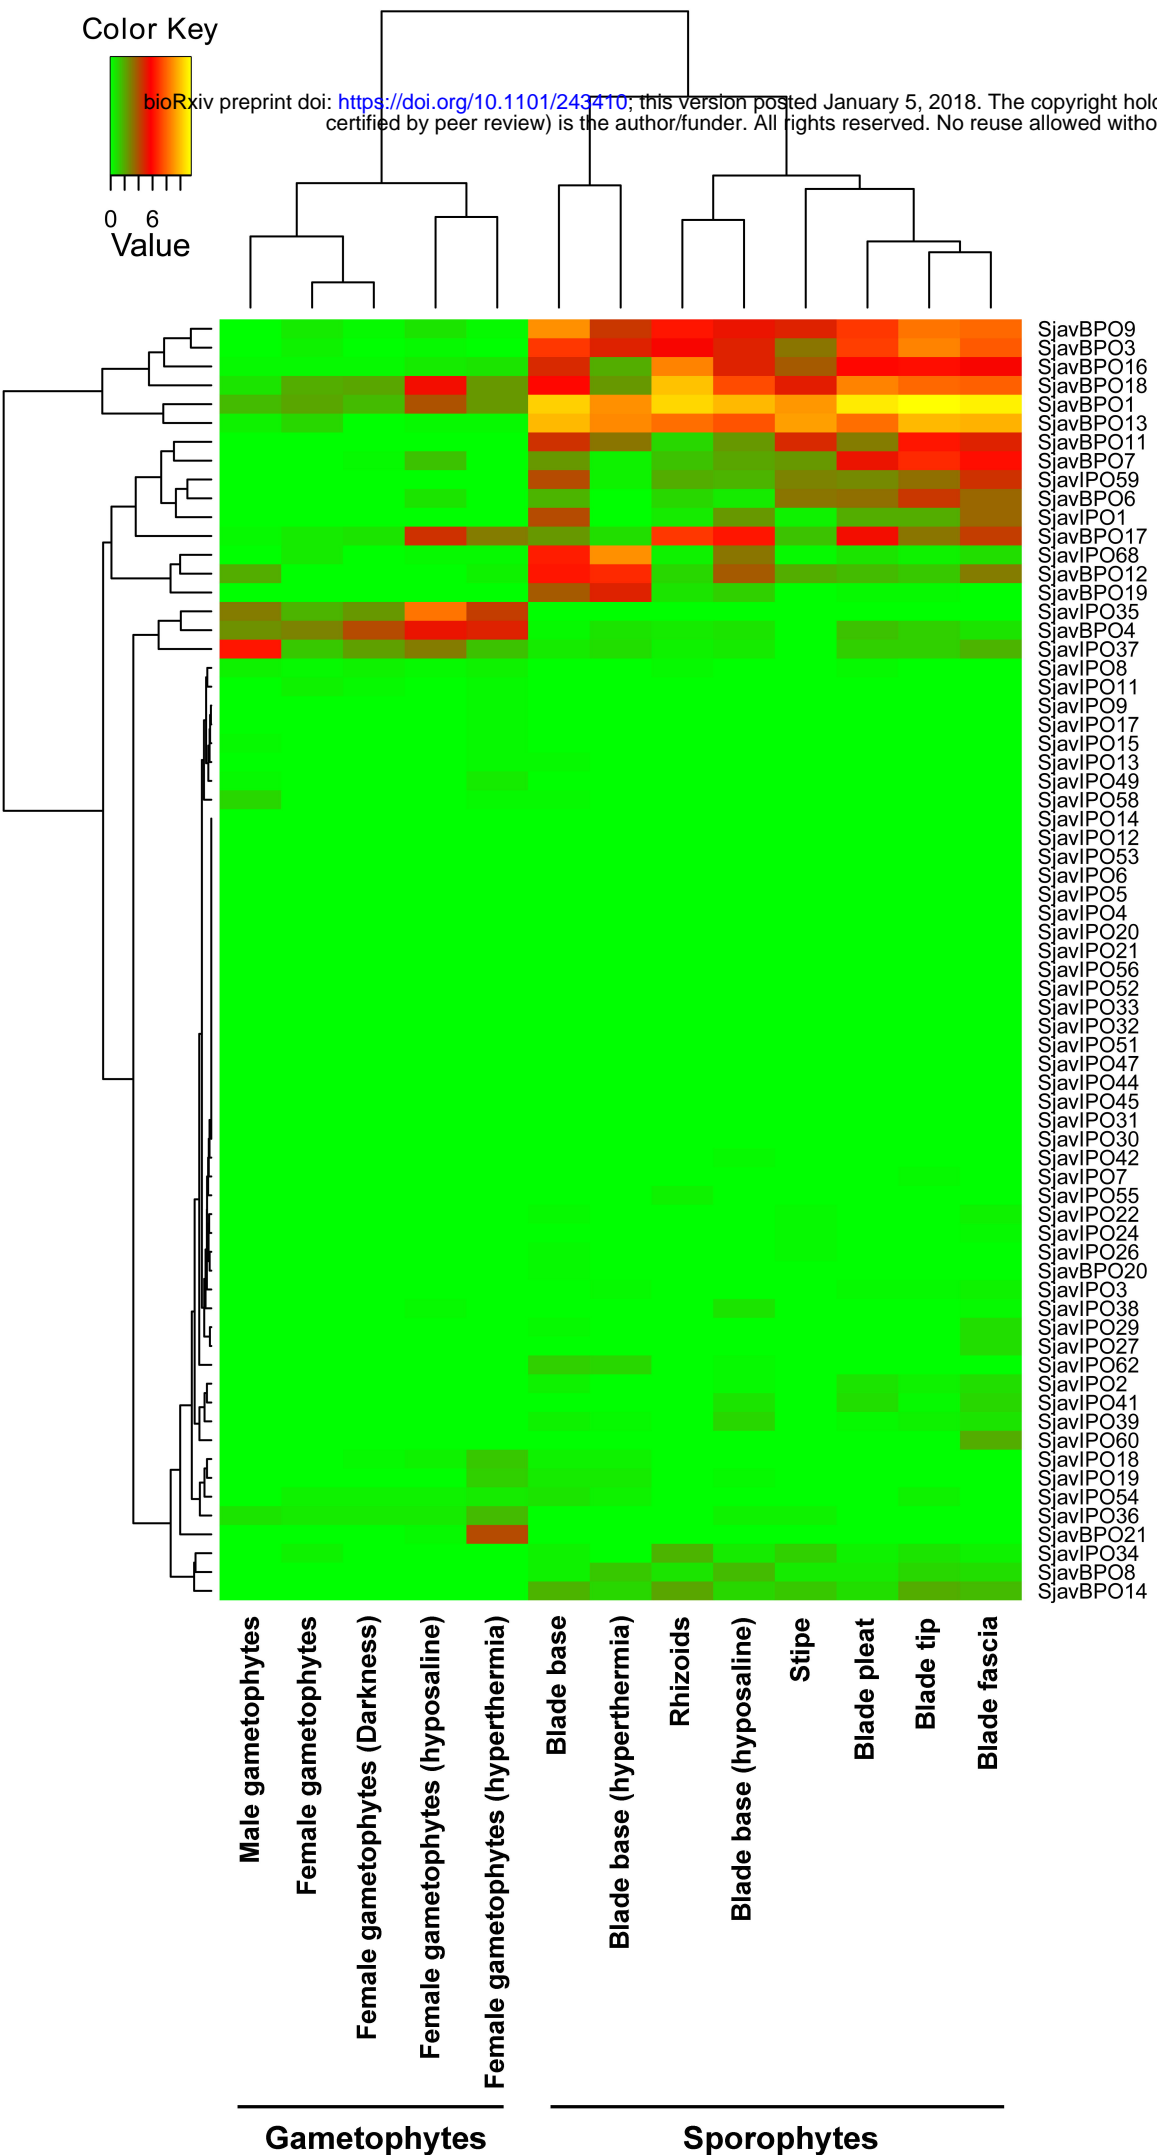

# Figure 5

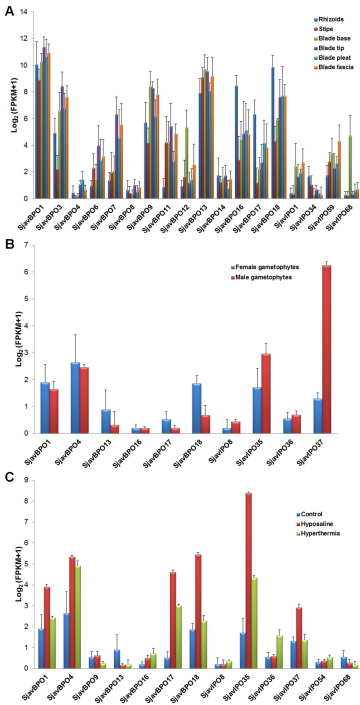

# Figure 6

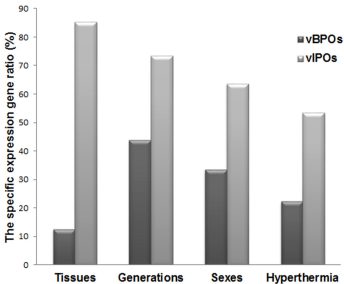

# Figure 7

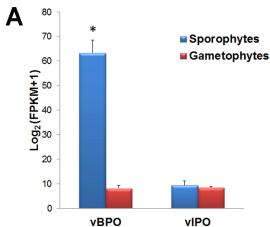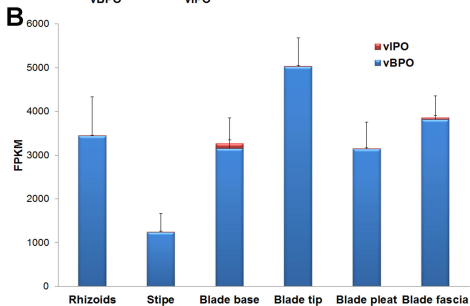

**Figure 8**

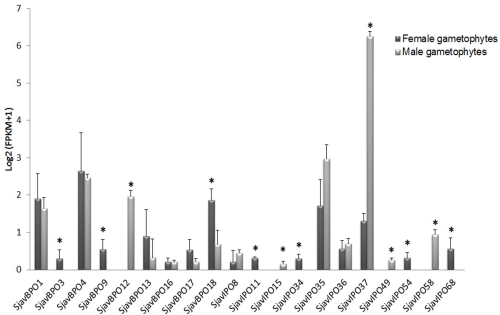

**Figure 9**

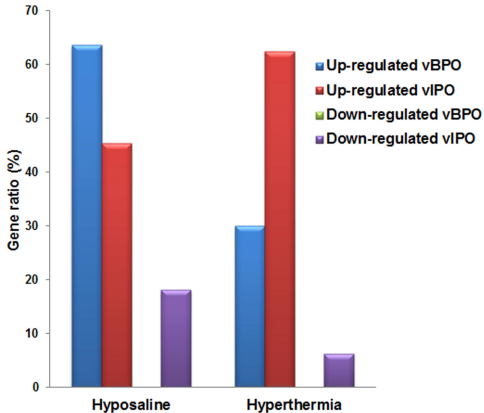

Source: https://www.biorxiv.org/content/10.1101/243410v1.full.pdf
